# Supplementary material
Source: PubMed Central journal article supplement (PMC8669719)
Supplement: mmc1.pdf [file mmc1.pdf]

# Síntomas neurológicos post-COVID-19

## Post-COVID-19 neurological symptoms

David Ezpeleta, David García-Azorín.

1. Servicio de Neurología. Hospital Universitario Quironsalud Madrid. Madrid, España.
2. Servicio de Neurología. Hospital Clínico Universitario de Valladolid. Valladolid, España.

Autor correspondencia

David Ezpeleta: neuroezpeleta@gmail.com

Que la COVID-19 iba a conllevar variadas manifestaciones neurológicas durante la primoinfección y síntomas persistentes tras esta era algo esperado. El *Manual COVID-19 para el neurólogo general*, publicado por la SEN el 20 de abril de 2020 (1), incluyó un capítulo que analizó las manifestaciones neurológicas de las epidemias por MERS (acrónimo en inglés del síndrome respiratorio del Oriente Próximo) de 2012 y SARS (acrónimo en inglés del síndrome respiratorio agudo grave) de 2002, también causadas por coronavirus (2). A nadie extrañó que los pacientes con COVID-19 pudieran debutar o desarrollar a lo largo de la fase aguda síntomas y síndromes neurológicos como cefalea, mialgias, confusión y diversos tipos de neuropatías. Sí supuso una sorpresa la alta frecuencia y especificidad de la anosmia como síntoma precoz, o la asociación de fenómenos trombóticos y encefalopáticos graves en las formas más tórpidas de la enfermedad. En relación con los síntomas persistentes tras la COVID-19, el principal heraldo provino de una publicación de 2011 donde se describió una serie de 22 pacientes (21 de ellos sanitarios) de Toronto que desarrollaron un cuadro crónico y discapacitante de dolor musculoesquelético generalizado, fatiga, depresión y trastorno del sueño tras haber sufrido SARS (2) (3). La experiencia clínica en esas semanas fatídicas de la primera ola de COVID-19 y especialmente en el tiempo transcurrido desde entonces confirmaron la sospecha.

Las publicaciones e intentos clasificatorios iniciales fueron muy loables, pero probablemente poco reflexivos. Las primeras definiciones conformaron un cajón de sastre donde todo tenía cabida: desde una secuela neurológica grave por ingreso prolongado en UCI hasta cuadros similares a la fibromialgia emergentes tras una ventana sin síntomas después de la infección, pasando por sensación subjetiva de disnea, mareo, inatención o anosmia tras superar una COVID-19 leve. Incluso entidades como una PCR persistentemente positiva tras la primoinfección, la reinfección por la misma o nuevas variantes, la infección o reinfección tras vacunación y hasta las potenciales complicaciones neurológicas de esta fueron en algún momento consideradas bajo el mismo, amplio e inespecífico paraguas.

Muchos artículos científicos, la mayor parte de las veces de acceso libre y gratuito para médicos, pero también para pacientes, tuvieron inmediato eco en la prensa generalista y las redes sociales, principales fuentes de información, desinformación y consuelo desde marzo de 2020. Una cuestión que para muchos supuso un error de bulto y que todavía se sigue pagando en forma de incertidumbre y menoscabo de la salud es la definición de estos cuadros post-COVID-19. Había que poner un nombre, una marca a la entidad aun desconociendo de qué se trataba exactamente y a qué se debía. En este caso, “el arte de llamar a nuestras cosas”, tan observada en Medicina, brilló por su ausencia. Fue dicho y hecho: COVID crónica, COVID persistente o *long-COVID* tuvieron un éxito inmediato y global, pero tales epítetos han supuesto una suerte de catástrofe semántica de incalculable poder iatrogénico, pues connotan que la COVID-19, o lo que es peor, el SARS-CoV-2, siguen ahí semanas o meses después, lo cual es falso. La denominación más canónica y actual de “síndrome COVID-19 post-agudo” (*post-acute COVID-19 syndrome* o PACS, su acrónimo en inglés) es más acertada y contiene menor carga peyorativa (4) (5), pero sigue siendo imperfecta. Por dichos motivos, en este número monográfico de *Neurology Perspectives* se ha preferido el empleo de “síntomas post-COVID-19” debido a que la heterogeneidad de los cuadros neurológicos descritos y los potenciales mecanismos de enfermedad, en gran medida desconocidos, hacen forzada su catalogación como síndrome. Pensamos que esta

simplificación es más real, más sincera y apenas tiene connotaciones sujetas a interpretación.

La mencionada heterogeneidad clínica de los síntomas neurológicos post-COVID-19 se hace patente si se atiende al espectro de posibles escenarios no excluyentes entre sí: secuelas de ingresos prolongados y estancias UCI, como la neuromiopatía del enfermo crítico; secuelas de complicaciones neurológicas de la fase aguda de la enfermedad, desde una anosmia que se mantiene en el tiempo hasta las producidas por un ictus de gran vaso; síndromes inmunomediados con el síndrome de Guillain-Barré; y, finalmente, síntomas post-COVID-19 de origen incierto y expresión clínica variable en forma de disautonomía, fenotipos parecidos a la fibromialgia, cefaleas persistentes o quejas cognitivas que pueden discapacitar al paciente. Si bien estos marcos, así considerados, suponen categorías bien definidas, muchos pacientes pueden compartirlos, especialmente aquellos con manifestaciones neurológicas clínicamente menores durante la fase aguda, como anosmia, cefalea o mialgias, que pueden prolongarse en el tiempo o incluso emerger tras la resolución de la infección conformando la misteriosa constelación de síntomas desafortunadamente catalogados como COVID crónica o persistente, más frecuente en pacientes jóvenes que tuvieron formas leves de la enfermedad.

Este abanico de manifestaciones ha supuesto una dificultad a la hora de enfocar este número monográfico, que podía abordarse de varias maneras. Por ello, se ha preferido presentar el problema, tras una introducción epidemiológica, fisiopatológica y clasificatoria, según los principales grupos de síntomas neurológicos por intensidad, discapacidad o frecuencia: síntomas cognitivos, síntomas de posible origen en el sistema nervioso periférico y muscular y cefalea persistente post-COVID-19. Se han dejado en el tintero los trastornos del sueño y los síntomas psicopatológicos y psiquiátricos, entre otros, con frecuencia asociados a los anteriores.

Tampoco se ahonda en el posible carácter funcional de algunos de estos síntomas, de cuerpo bibliográfico creciente. En este sentido, algunos autores han planteado la posibilidad de que los síntomas post-COVID-19 menos específicos,

encuadrados como COVID-crónica, persistente o *long-COVID*, suponen la primera enfermedad construida por pacientes que, sin posibilidad de ser atendidos por médicos que desconocían o ninguneaban el cuadro, se han visto reflejados en los comentarios de otras personas en las redes sociales (6) (7), una enfermedad colectiva creada y bautizada por pacientes que ha distorsionado el conocimiento científico al uso de su verdadera historia natural (8). Esta posibilidad, lejos de justificar los síntomas, sí contiene verdades entreveradas, pues muchos de los médicos también han sido pacientes y el ambiente de infoxicación que hemos tenido que soportar desde el comienzo de la pandemia ha añadido un importantísimo e inédito componente psicosocial catalizador o perpetuador de los síntomas. En relación con esto último, se acaba de publicar (8 de noviembre de 2021) un trabajo clave llevado a cabo en 26.823 participantes de una cohorte poblacional francesa. La infección autorreportada se asoció con síntomas físicos persistentes con *odds ratios* (OR) desde 1,39 (IC 95%, 1,03-1,86) hasta 16,37 (IC 95%, 10,21-26,24) excepto para síntomas auditivos y trastorno del sueño, mientras que la serología positiva para SARS-CoV-2 se asoció solo con anosmia persistente (OR 2,72; IC 95%, 1,66-4,46) incluso restringiendo el análisis a los participantes que atribuyeron sus síntomas a la infección COVID-19. En conclusión, estos datos sugieren que los "síntomas persistentes post-COVID-19" parecen asociarse más a la convicción de haber sido infectado por el virus que a su confirmación serológica (9). Esta información puede cambiar las reglas del juego de ahora en adelante.

Pese a los números frecuente y arbitrariamente repetidos por sumadores, multiplicadores, opinadores y augures de lo trágico ("un 10% de los pacientes, unas 500.000 personas en España", etc.) no creemos que los síntomas post-COVID-19 vayan a suponer una nueva pandemia insoportable e insostenible por el Sistema Nacional de Salud. Nunca llueve eternamente y los sistemas biológicos tienden a la autorregulación y el orden. La mayoría de los pacientes, incluso los más expuestos y vulnerables a la presión psicosocial antes referida, mejoran tarde o temprano en buenas manos o sin ayuda. La vida sigue y las pandemias se superan.

Los artículos de este número se han redactado entre julio y octubre de 2021. Siendo conscientes de que se trata de síntomas en proceso de definición, de "síntomas

en la niebla”, si se nos permite la expresión, se creyó oportuno y sobre todo necesario impulsar la creación de este monográfico sobre los principales síntomas neurológicos post-COVID-19. Aun habiendo escasa bibliografía y a sabiendas de que hay trabajos de calidad ya publicados (10) (11) (12) o en marcha que no tardarán en dar respuestas, se pidió a todos los autores un esfuerzo de revisión, ordenación, clarificación e incluso prospección de los grupos de síntomas encomendados. Todos, autores y editores, somos conscientes del valor efímero de esta tarea colectiva, pero poner un poco de orden en este maremágnum, bien justifica el tiempo y la dedicación invertidos en este cometido.

## **Bibliografía**

1. Manual COVID-19 para el neurólogo general. Ezpeleta D, García Azorín D, editores. ISBN: 978-84-946708-3-1. DL: M-11429-2020. Ediciones SEN, 2020.
2. García-Moncó JC. Cuadros clínicos neurológicos asociados a la infección por otros coronavirus. En: Manual COVID-19 para el neurólogo general. Ezpeleta D, García Azorín D, editores. ISBN: 978-84-946708-3-1. DL: M-11429-2020. Ediciones SEN, 2020.
3. Moldofsky H, Patcai J. Chronic widespread musculoskeletal pain, fatigue, depression and disordered sleep in chronic post-SARS syndrome; a case-controlled study. *BMC Neurol.* 2011 Mar 24;11:37. doi: 10.1186/1471-2377-11-37.
4. Nalbandian A, Sehgal K, Gupta A, Madhavan MV, McGroder C, Stevens JS, et al. Post-acute COVID-19 syndrome. *Nat Med.* 2021 Apr;27(4):601-615. doi: 10.1038/s41591-021-01283-z.
5. Moghimi N, Di Napoli M, Biller J, Siegler JE, Shekhar R, McCullough LD, et al. The neurological manifestations of post-acute sequelae of SARS-CoV-2 infection. *Curr Neurol Neurosci Rep.* 2021 Jun 28;21(9):44. doi: 10.1007/s11910-021-01130-1.
6. Callard F, Perego E. How and why patients made Long Covid. *Soc Sci Med.* 2021 Jan;268:113426. doi: 10.1016/j.socscimed.2020.113426.
7. Rushforth A, Ladds E, Wieringa S, Taylor S, Husain L, Greenhalgh T. Long Covid - The illness narratives. *Soc Sci Med.* 2021 Oct;286:114326. doi: 10.1016/j.socscimed.2021.114326.

8. Callard F. Epidemic Time: Thinking from the Sickbed. *Bull Hist Med.* 2020;94(4):727-743. doi: 10.1353/bhm.2020.0093.
9. Matta J, Wiernik E, Robineau O, Carrat F, Touvier M, Severi G, et al. Pratiques, Relations et Inégalités Sociales en Population Générale Pendant la Crise COVID-19-Sérologie (SAPRIS-SERO) Study Group. Association of self-reported COVID-19 infection and SARS-CoV-2 serology test results with persistent physical symptoms among French adults during the COVID-19 pandemic. *JAMA Intern Med.* 2021 Nov 8. doi: 10.1001/jamainternmed.2021.6454.
10. Augustin M, Schommers P, Stecher M, Dewald F, Gieselmann L, Gruell H, et al. Post-COVID syndrome in non-hospitalised patients with COVID-19: a longitudinal prospective cohort study. *Lancet Reg Health Eur.* 2021 Jul;6:100122. doi: 10.1016/j.lanepe.2021.100122.
11. Beghi E, Giussani G, Westenberg E, Allegri R, Garcia-Azorin D, Guekht A, Frontera J, Kivipelto M, Mangialasche F, Mukaetova-Ladinska EB, Prasad K, Chowdhary N, Winkler AS. Acute and post-acute neurological manifestations of COVID-19: present findings, critical appraisal, and future directions. *J Neurol.* 2021 Oct 21:1-10. doi: 10.1007/s00415-021-10848-4.
12. Camargo-Martínez W, Lozada-Martínez I, Escobar-Collazos A, Navarro-Coronado A, Moscote-Salazar L, Pacheco-Hernández A, et al. Post-COVID 19 neurological syndrome: implications for sequelae's treatment. *J Clin Neurosci.* 2021 Jun;88:219-225. doi: 10.1016/j.jocn.2021.04.001.
